# Supplementary material for: Spatial–Seasonal Isotopic Variations in a Surface–Groundwater System in an Extremely Arid Basin and the Associated Hydrogeological Indications
Source: Copernicus journal article supplement (doi:10.5194/hess-2023-67), 2023-04-12
Supplement: Supplementary file 1 [file hess-2023-67-supplement.pdf]

1 **Table S1.** Isotopic values ( $\delta^{18}\text{O}$ ,  $\delta\text{D}$  and d-excess) and tritium concentrations ( $^3\text{H}$ ) of different water bodies in various watersheds of the Qaidam  
 2 Basin during the wet and dry seasons

| Watershed  | Water type           |      | $\delta^{18}\text{O}$ | $\delta\text{D}$ | d-excess | $\delta^{18}\text{O}$ | $\delta\text{D}$ | d-excess | $^3\text{H}$ | Source     |
|------------|----------------------|------|-----------------------|------------------|----------|-----------------------|------------------|----------|--------------|------------|
|            |                      |      | (‰)                   | (‰)              | (‰)      | (‰)                   | (‰)              | (‰)      | (TU)         |            |
|            |                      |      | <b>Wet season</b>     |                  |          | <b>Dry season</b>     |                  |          |              |            |
| Aler       | Surface water        | Mean | -7.27                 | -47.79           | 10.38    |                       |                  |          | 10.32        | This study |
|            |                      | Max  | -5.13                 | -40.03           | 19.74    |                       |                  |          | 16.43        |            |
|            |                      | Min  | -9.41                 | -55.54           | 1.01     |                       |                  |          | 4.20         |            |
|            |                      | SD   | 2.14                  | 7.76             | 9.37     |                       |                  |          | 6.12         |            |
|            | Phreatic groundwater | Mean | -8.50                 | -59.59           | 8.41     |                       |                  |          | 3.14         |            |
|            |                      | Max  | -7.64                 | -53.86           | 18.62    |                       |                  |          | 9.21         |            |
|            |                      | Min  | -9.06                 | -72.46           | -11.34   |                       |                  |          | B.D.         |            |
|            |                      | SD   | 0.54                  | 7.49             | 11.72    |                       |                  |          | 4.30         |            |
|            | Confined groundwater | Mean | -9.05                 | -55.09           | 17.29    |                       |                  |          | B.D.         |            |
|            |                      | Max  | -8.74                 | -51.01           | 18.91    |                       |                  |          |              |            |
|            |                      | Min  | -9.39                 | -57.50           | 16.06    |                       |                  |          |              |            |
|            |                      | SD   | 0.27                  | 2.62             | 1.09     |                       |                  |          |              |            |
| Nalenggele | Surface water        | Mean | -8.44                 | -53.27           | 14.21    | -9.04                 | -57.71           | 14.64    | 16.38        |            |
|            |                      | Max  | -7.70                 | -50.60           | 20.42    | -8.15                 | -51.07           | 23.05    | 17.84        |            |
|            |                      | Min  | -9.71                 | -57.26           | 9.98     | -13.51                | -85.00           | 12.12    | 15.31        |            |
|            |                      | SD   | 0.60                  | 1.64             | 3.34     | 1.14                  | 7.10             | 2.66     | 0.92         |            |
|            | Phreatic groundwater | Mean | -7.91                 | -55.21           | 8.09     | -8.89                 | -57.28           | 13.83    | 10.25        |            |
|            |                      | Max  | -5.21                 | -48.18           | 17.95    | -7.80                 | -50.72           | 17.00    | 19.07        |            |
|            |                      | Min  | -9.60                 | -62.31           | -8.05    | -10.65                | -70.41           | 5.73     | B.D.         |            |
|            |                      | SD   | 1.24                  | 3.58             | 7.50     | 0.47                  | 3.42             | 1.99     | 4.50         |            |

| Watershed | Water type           |          | $\delta^{18}\text{O}$ | $\delta\text{D}$ | d-excess | $\delta^{18}\text{O}$ | $\delta\text{D}$ | d-excess | $^3\text{H}$ | Source |
|-----------|----------------------|----------|-----------------------|------------------|----------|-----------------------|------------------|----------|--------------|--------|
|           |                      |          | (‰)                   | (‰)              | (‰)      | (‰)                   | (‰)              | (‰)      | (TU)         |        |
|           |                      |          | Wet season            |                  |          | Dry season            |                  |          |              |        |
| Golmud    | Confined groundwater | Mean     | -7.54                 | -53.52           | 6.80     | -8.77                 | -55.49           | 14.67    | 10.59        |        |
|           |                      | Max      | -6.51                 | -49.57           | 11.13    | -8.63                 | -55.24           | 15.90    | 12.76        |        |
|           |                      | $N_W=2$  | Min                   | -8.58            | -57.47   | 2.47                  | -8.91            | -55.86   | 13.79        | 8.42   |
|           |                      | $N_D=3$  | SD                    | 1.04             | 3.95     | 4.33                  | 0.11             | 0.26     | 0.90         | 2.17   |
|           | Surface water        | Mean     | -8.87                 | -58.76           | 12.23    | -9.77                 | -65.05           | 13.14    | 14.03        |        |
|           |                      | Max      | -6.62                 | -47.50           | 20.48    | -7.13                 | -49.54           | 22.10    | 16.66        |        |
|           |                      | $N_W=15$ | Min                   | -11.25           | -69.52   | 5.46                  | -11.94           | -77.67   | 5.78         | 12.16  |
|           |                      | $N_D=29$ | SD                    | 1.07             | 4.83     | 4.10                  | 0.98             | 5.14     | 3.43         | 1.18   |
|           | Phreatic groundwater | Mean     | -10.07                | -68.54           | 12.03    | -10.30                | -68.68           | 13.71    | 6.50         |        |
|           |                      | Max      | -8.22                 | -61.52           | 17.70    | -9.27                 | -62.22           | 18.08    | 10.82        |        |
|           |                      | $N_W=20$ | Min                   | -11.99           | -81.71   | 1.98                  | -11.11           | -74.28   | 11.60        | B.D.   |
|           |                      | $N_D=15$ | SD                    | 0.90             | 4.60     | 3.63                  | 0.53             | 3.08     | 1.65         | 3.52   |
|           | Confined groundwater | Mean     | -10.84                | -73.99           | 12.71    | -10.84                | -72.21           | 13.61    | 1.93         |        |
|           |                      | Max      | -9.87                 | -66.58           | 15.36    | -9.57                 | -65.94           | 19.48    | 8.54         |        |
|           |                      | $N_W=19$ | Min                   | -12.12           | -85.00   | 1.49                  | -11.53           | -77.79   | 0.00         | B.D.   |
|           |                      | $N_D=15$ | SD                    | 0.61             | 4.18     | 3.40                  | 0.53             | 3.50     | 4.14         | 3.05   |
| Numhon    | Surface water        | Mean     | -9.95                 | -69.04           | 10.58    | -9.88                 | -69.68           | 9.34     | 7.64         |        |
|           |                      | Max      | -7.35                 | -59.60           | 16.56    | -9.08                 | -65.98           | 13.21    | 9.57         |        |
|           |                      | $N_W=3$  | Min                   | -11.36           | -74.32   | -0.80                 | -11.01           | -74.90   | 6.64         | 6.51   |
|           |                      | $N_D=3$  | SD                    | 1.84             | 6.69     | 8.05                  | 0.83             | 3.80     | 2.81         | 1.37   |
|           | Phreatic groundwater | Mean     | -11.74                | -78.26           | 15.69    | -11.00                | -74.89           | 13.07    | 3.88         |        |
|           |                      | Max      | -10.66                | -70.28           | 16.86    | -7.89                 | -62.54           | 17.35    | 13.08        |        |

| Watershed | Water type           |         | $\delta^{18}\text{O}$ | $\delta\text{D}$ | d-excess | $\delta^{18}\text{O}$ | $\delta\text{D}$ | d-excess | $^3\text{H}$ | Source |
|-----------|----------------------|---------|-----------------------|------------------|----------|-----------------------|------------------|----------|--------------|--------|
|           |                      |         | (‰)                   | (‰)              | (‰)      | (‰)                   | (‰)              | (‰)      | (TU)         |        |
|           |                      |         | Wet season            |                  |          | Dry season            |                  |          |              |        |
|           | $N_W=15$             | Min     | -12.70                | -87.38           | 14.22    | -12.04                | -79.96           | 0.58     | B.D.         |        |
|           | $N_D=11$             | SD      | 0.47                  | 3.86             | 0.71     | 1.24                  | 5.83             | 4.86     | 4.83         |        |
|           | Confined groundwater | Mean    | -12.01                | -80.86           | 15.22    | -11.24                | -76.28           | 13.63    | 2.16         |        |
|           |                      | Max     |                       |                  |          |                       |                  |          |              |        |
|           |                      | $N_W=1$ | Min                   |                  |          |                       |                  |          |              |        |
|           |                      | $N_D=1$ | SD                    |                  |          |                       |                  |          |              |        |
|           | Surface water        | Mean    | -8.79                 | -61.58           | 8.74     | -9.63                 | -67.23           | 9.78     | 9.88         |        |
|           |                      | Max     | -7.97                 | -58.45           | 14.11    | -8.16                 | -60.27           | 16.15    | 10.66        |        |
|           |                      | $N_W=5$ | Min                   | -9.47            | -65.79   | 4.72                  | -11.66           | -77.14   | 4.98         | 9.12   |
|           |                      | $N_D=3$ | SD                    | 0.56             | 3.00     | 3.65                  | 1.49             | 7.19     | 4.69         | 0.63   |
|           | Phreatic groundwater | Mean    | -9.53                 | -67.13           | 9.09     | -10.47                | -71.86           | 11.89    | 8.43         |        |
|           |                      | Max     | -9.05                 | -65.24           | 10.82    | -9.02                 | -65.09           | 15.46    | 8.76         |        |
|           |                      | $N_W=6$ | Min                   | -9.94            | -68.70   | 7.16                  | -11.64           | -77.68   | 7.11         | 7.95   |
|           |                      | $N_D=4$ | SD                    | 0.26             | 1.28     | 1.26                  | 1.04             | 5.29     | 3.11         | 0.35   |
|           | Confined groundwater | Mean    |                       |                  |          |                       |                  |          |              |        |
|           |                      | Max     |                       |                  |          |                       |                  |          |              |        |
|           |                      | $N_W=0$ | Min                   |                  |          |                       |                  |          |              |        |
|           |                      | $N_D=0$ | SD                    |                  |          |                       |                  |          |              |        |
|           | Surface water        | Mean    | -9.80                 | -61.57           | 16.83    | -11.21                | -74.42           | 15.24    |              |        |
|           |                      | Max     |                       |                  |          | -10.78                | -71.60           | 16.24    |              |        |
|           |                      | $N_W=1$ | Min                   |                  |          |                       | -11.97           | -79.49   | 14.61        |        |
|           |                      | $N_D=3$ | SD                    |                  |          |                       | 0.54             | 3.60     | 0.71         |        |

| Watershed            | Water type           |         | $\delta^{18}\text{O}$ | $\delta\text{D}$ | d-excess | $\delta^{18}\text{O}$ | $\delta\text{D}$ | d-excess | $^3\text{H}$ | Source |
|----------------------|----------------------|---------|-----------------------|------------------|----------|-----------------------|------------------|----------|--------------|--------|
|                      |                      |         | (‰)                   | (‰)              | (‰)      | (‰)                   | (‰)              | (‰)      | (TU)         |        |
|                      |                      |         | Wet season            |                  |          | Dry season            |                  |          |              |        |
| Yuka                 | Phreatic groundwater | Mean    |                       |                  |          |                       |                  |          |              |        |
|                      |                      | Max     |                       |                  |          |                       |                  |          |              |        |
|                      |                      | $N_W=4$ | Min                   |                  |          |                       |                  |          |              |        |
|                      |                      | $N_D=0$ | SD                    |                  |          |                       |                  |          |              |        |
|                      | Confined groundwater | Mean    |                       |                  |          |                       |                  |          |              |        |
|                      |                      | Max     |                       |                  |          |                       |                  |          |              |        |
|                      |                      | $N_W=4$ | Min                   |                  |          |                       |                  |          |              |        |
|                      |                      | $N_D=0$ | SD                    |                  |          |                       |                  |          |              |        |
|                      | Surface water        | Mean    | -9.93                 | -63.91           | 15.53    | -10.81                | -70.85           | 15.64    | 13.52        |        |
|                      |                      | Max     | -9.27                 | -57.65           | 16.51    | -10.31                | -69.94           | 18.74    | 15.32        |        |
|                      |                      | $N_W=4$ | Min                   | -10.90           | -72.06   | 14.95                 | -11.31           | -71.76   | 12.53        | 10.39  |
|                      |                      | $N_D=3$ | SD                    | 0.70             | 6.03     | 0.69                  | 0.50             | 0.91     | 3.11         | 2.22   |
|                      | Phreatic groundwater | Mean    | -11.17                | -74.61           | 14.75    | -10.69                | -71.87           | 13.66    | 13.42        |        |
|                      |                      | Max     | -10.95                | -72.56           | 15.33    | -10.66                | -71.04           | 14.72    | 30.35        |        |
|                      |                      | $N_W=5$ | Min                   | -11.37           | -77.08   | 13.88                 | -10.72           | -72.69   | 12.61        | 0.60   |
|                      |                      | $N_D=3$ | SD                    | 0.17             | 1.66     | 0.54                  | 0.03             | 0.82     | 1.05         | 10.85  |
| Confined groundwater | Mean                 |         |                       |                  |          |                       |                  |          |              |        |
|                      | Max                  |         |                       |                  |          |                       |                  |          |              |        |
|                      | $N_W=0$              | Min     |                       |                  |          |                       |                  |          |              |        |
|                      | $N_D=0$              | SD      |                       |                  |          |                       |                  |          |              |        |
| Bayin                |                      | Mean    | -8.41                 | -56.65           | 10.66    | -9.20                 | -59.50           | 14.10    | 16.17        |        |
|                      |                      | Max     | -6.60                 | -50.80           | 15.72    | -8.71                 | -56.88           | 15.90    | 17.80        |        |

| Watershed | Water type           |          | $\delta^{18}\text{O}$ | $\delta\text{D}$ | d-excess | $\delta^{18}\text{O}$ | $\delta\text{D}$ | d-excess | $^3\text{H}$ | Source           |
|-----------|----------------------|----------|-----------------------|------------------|----------|-----------------------|------------------|----------|--------------|------------------|
|           |                      |          | (‰)                   | (‰)              | (‰)      | (‰)                   | (‰)              | (‰)      | (TU)         |                  |
|           |                      |          | Wet season            |                  |          | Dry season            |                  |          |              |                  |
|           | Surface water        | Min      | -9.44                 | -60.10           | -4.30    | -9.54                 | -61.25           | 11.99    | 14.00        |                  |
|           |                      | $N_W=18$ | 0.81                  | 2.62             | 4.85     | 0.26                  | 1.47             | 1.21     | 1.60         |                  |
|           |                      | $N_D=10$ |                       |                  |          |                       |                  |          |              |                  |
|           | Phreatic groundwater | Mean     | -9.04                 | -59.55           | 12.74    | -9.49                 | -61.40           | 14.49    | 9.89         |                  |
|           |                      | Max      | -6.50                 | -42.00           | 17.78    | -8.41                 | -54.41           | 18.81    | 15.60        |                  |
|           |                      | $N_W=25$ | -10.60                | -71.10           | 8.84     | -10.33                | -69.11           | 8.46     | 1.30         |                  |
|           |                      | $N_D=9$  | 0.71                  | 5.26             | 1.82     | 0.56                  | 3.76             | 3.24     | 3.43         |                  |
|           | Confined groundwater | Mean     | -9.36                 | -61.83           | 13.06    | -9.55                 | -60.29           | 16.09    | 7.95         |                  |
|           |                      | Max      | -8.82                 | -58.30           | 14.04    | -9.24                 | -56.22           | 17.70    | 11.90        |                  |
|           |                      | $N_W=4$  | -10.08                | -66.60           | 12.26    | -10.17                | -66.60           | 14.69    | 3.70         |                  |
|           |                      | $N_D=4$  | 0.46                  | 3.12             | 0.68     | 0.37                  | 3.84             | 1.38     | 3.64         |                  |
|           |                      | Mean     | -7.06                 | -39.12           | 17.32    |                       |                  |          |              |                  |
|           | Rain water           | Max      | 2.55                  | 30.49            | 38.60    |                       |                  |          |              |                  |
|           |                      | $N=51$   | -23.38                | -158.64          | -6.96    |                       |                  |          |              |                  |
|           |                      | SD       | 4.73                  | 35.95            | 8.44     |                       |                  |          |              |                  |
|           |                      | Mean     |                       |                  |          | -13.64                | -87.73           | 21.43    |              |                  |
|           | Snowmelt             | Max      |                       |                  |          | -11.30                | -61.68           | 31.65    |              |                  |
|           |                      | $N=5$    |                       |                  |          | -19.30                | -152.02          | 2.38     |              |                  |
|           |                      | SD       |                       |                  |          | 2.92                  | 33.33            | 10.23    |              |                  |
|           |                      | Mean     | -7.80                 | -51.79           | 10.62    |                       |                  |          |              |                  |
|           | Rain water           | Max      | 0.27                  | 13.75            | 20.89    |                       |                  |          |              |                  |
|           |                      | $N=20$   | -17.24                | -125.17          | 1.31     |                       |                  |          |              |                  |
|           |                      | Min      |                       |                  |          |                       |                  |          |              |                  |
|           |                      |          |                       |                  |          |                       |                  |          |              | Zhu et al., 2015 |

| Watershed | Water type      | Wet season                   |                         |                 | Dry season                   |                         |                 | <sup>3</sup> H<br>(TU) | Source |
|-----------|-----------------|------------------------------|-------------------------|-----------------|------------------------------|-------------------------|-----------------|------------------------|--------|
|           |                 | $\delta^{18}\text{O}$<br>(‰) | $\delta\text{D}$<br>(‰) | d-excess<br>(‰) | $\delta^{18}\text{O}$<br>(‰) | $\delta\text{D}$<br>(‰) | d-excess<br>(‰) |                        |        |
|           |                 | SD                           | 5.13                    | 40.59           | 4.90                         |                         |                 |                        |        |
|           | Snowmelt<br>N=7 | Mean                         |                         |                 |                              | -11.50                  | -78.40          | 13.56                  |        |
|           |                 | Max                          |                         |                 |                              | -2.19                   | 32.40           | 49.92                  |        |
|           |                 | Min                          |                         |                 |                              | -20.05                  | -141.73         | -15.89                 |        |
|           |                 | SD                           |                         |                 |                              | 5.59                    | 53.86           | 18.87                  |        |

$N_{W/D}$  represents the number of samplings in wet/dry season; N represents the number of samplings of rain water or snowmelt; **B.D.** represents below the detection limit.

## References

- Yang, N., Zhou, P., Wang, G., Zhang, B., Shi, Z., Liao, F., ... & Gu, X. (2021). Hydrochemical and isotopic interpretation of interactions between surfaces water and groundwater in Delingha, Northwest China. *Journal of Hydrology*, 598, 126243.
- Zhu, J., Chen, H., & Gong, G. (2015). Hydrogen and oxygen isotopic compositions of precipitation and its water vapor sources in Eastern Qaidam Basin. *Environmental Science*, 36(8), 2784-2790 (in Chinese with English abstract).

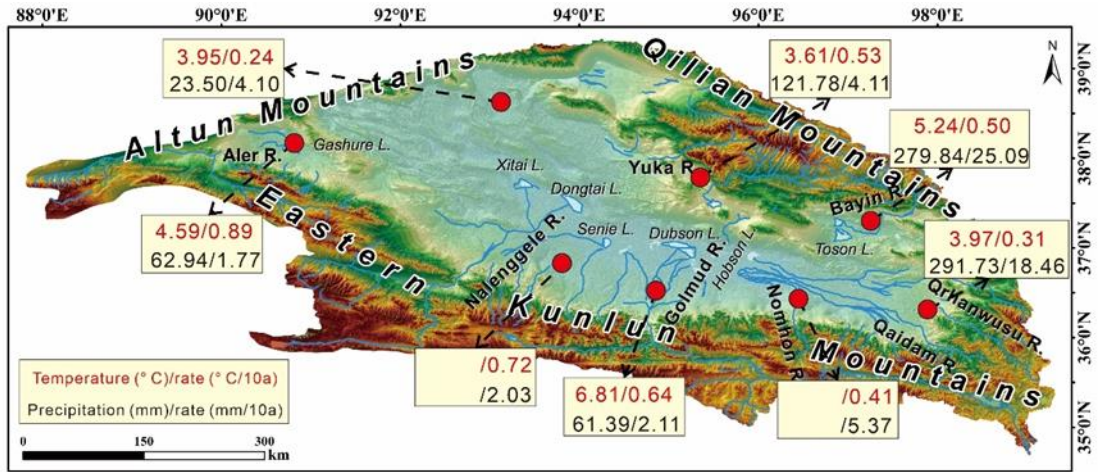

10

11 **Figure S1.** Average annual temperature and precipitation of each meteorological station in the  
 12 Qaidam Basin since 2005 and rise in temperature and precipitation since 1961 (The rate data are  
 13 from Yang et al., 2014)

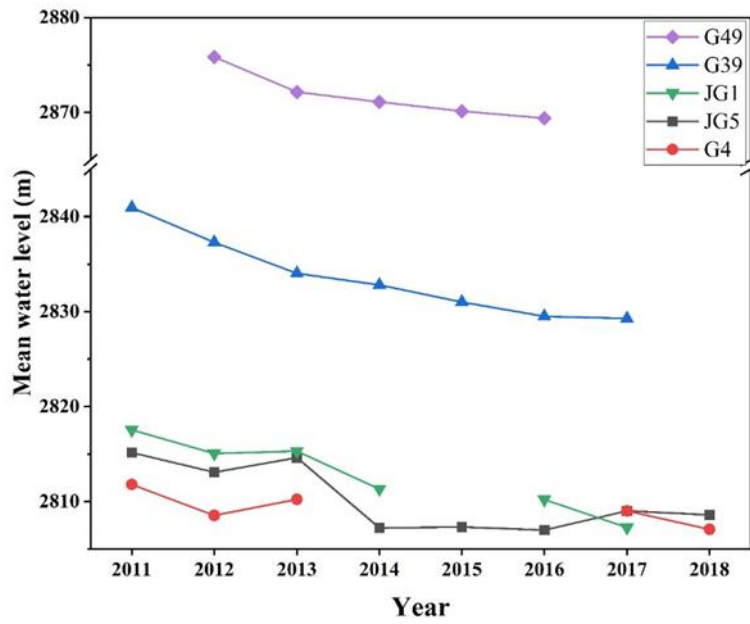

14

15 **Figure S2.** Changes in groundwater level in the Golmud River from 2011 to 2018
